# Supplementary material for: Larval Transport Modeling of Deep-Sea Invertebrates Can Aid the Search for Undiscovered Populations
Source: PLoS One. 2011 Aug 8;6(8):e23063. doi: 10.1371/journal.pone.0023063 (PMC3152551; doi:10.1371/journal.pone.0023063)
Supplement: Supporting information S3 — Deep-sea chiton dataset [XLS]. An Excel file that contains the abundance (number of specimens) and distribution of deep sea chiton species. These data encompass several species of chiton because the majority of simulations in the paper used these data. Data upon individual chiton species can be obtained from the authors. (XLS) [file pone.0023063.s003.xls]

## Sheet: deep-sea chiton distribution
Locality	IslandID	longitude	latitude	abundance (num spms)
New Caledonia	2	166.84	-21.8778	8
New Caledonia	2	166.768	-21.8137	6
New Caledonia	2	165.9	-21.2195	11
New Caledonia	2	165.916	-21.2408	6
New Caledonia	2	165.834	-21.0833	1
New Caledonia	2	165.577	-20.9538	13
New Caledonia	2	164.965	-20.5765	11
New Caledonia	2	164.955	-20.5697	5
New Caledonia	2	165.598	-20.959	6
New Caledonia	2	166.596	-21.712	4
New Caledonia	2	166.631	-21.6963	4
New Caledonia	2	166.589	-21.7377	5
New Caledonia	2	166.068	-22.1593	1
New Caledonia	2	163.863	-20.2655	3
New Caledonia	2	163.834	-20.279	5
New Caledonia	2	164.972	-20.5635	10
New Caledonia	2	164.979	-20.5783	5
Vanuatu	1	168.919	-18.8723	4
Vanuatu	1	168.936	-18.7953	2
Vanuatu	1	168.734	-17.9337	2
Vanuatu	1	168.339	-16.9083	1
Vanuatu	1	168.022	-16.6533	3
Vanuatu	1	167.957	-16.4658	7
Vanuatu	1	167.405	-15.807	84
Vanuatu	1	167.453	-15.8877	2
Vanuatu	1	167.507	-15.8968	2
Vanuatu	1	167.462	-15.955	1
Vanuatu	1	167.234	-15.1697	3
Vanuatu	1	167.252	-15.1538	2
Vanuatu	1	167.287	-15.147	1
Vanuatu	1	167.3	-14.87	4
Vanuatu	1	167.253	-14.8193	1
Vanuatu	1	166.641	-15.9605	5
Vanuatu	1	166.666	-15.9725	1
Solomon Islands	3	159.823	-9.045	1
Solomon Islands	3	160.41	-9.355	8
Solomon Islands	3	160.128	-9.26833	3
Solomon Islands	3	160.622	-9.535	6
Solomon Islands	3	159.083	-8.955	6
Solomon Islands	3	159.673	-8.69333	7
Solomon Islands	3	159.722	-8.81	1
Solomon Islands	3	159.663	-8.78167	4
Solomon Islands	3	159.632	-8.78333	10
Solomon Islands	3	159.995	-8.28167	7
Solomon Islands	3	160	-8.28333	22
Solomon Islands	3	159.997	-8.29167	8
Solomon Islands	3	160.032	-8.32667	1
Solomon Islands	3	159.443	-8.39833	9
Solomon Islands	3	159.445	-8.41333	7
Solomon Islands	3	159.44	-8.425	5
Solomon Islands	3	159.432	-8.42667	1
Solomon Islands	3	158.5	-7.72667	1
Solomon Islands	3	158.483	-7.72333	2
Solomon Islands	3	157.707	-7.59833	5
Solomon Islands	3	157.695	-7.63	30
Solomon Islands	3	157.715	-7.645	8
Solomon Islands	3	157.705	-7.73833	1
Solomon Islands	3	157.657	-7.755	4
Solomon Islands	3	157.687	-7.82167	12
Solomon Islands	3	157.577	-7.93833	1
Solomon Islands	3	157.573	-7.97167	29
Solomon Islands	3	157.565	-7.96833	1
Solomon Islands	3	156.238	-6.65	23
Solomon Islands	3	156.212	-6.62	32
Solomon Islands	3	156.175	-6.57833	5
Solomon Islands	3	156.353	-6.92167	4
Solomon Islands	3	156.455	-7.715	13
Solomon Islands	3	156.445	-7.75	2
Solomon Islands	3	156.433	-7.71833	3
Solomon Islands	3	156.41	-7.71	1
Solomon Islands	3	156.412	-7.74833	4
Solomon Islands	3	156.413	-7.70833	0
Solomon Islands	3	156.292	-7.47333	0
Solomon Islands	3	156.25	-7.44167	3
Solomon Islands	3	156.997	-8.125	2
Solomon Islands	3	156.853	-7.94	5
Solomon Islands	3	156.855	-7.91333	16
Solomon Islands	3	156.85	-7.87333	30
Solomon Islands	3	156.877	-7.91333	2
Solomon Islands	3	156.867	-7.8	12
Solomon Islands	3	156.888	-7.81167	11
Solomon Islands	3	156.98	-7.63167	3
Solomon Islands	3	157.735	-8.93667	5
Solomon Islands	3	157.713	-8.53	2
Solomon Islands	3	157.637	-8.69167	1
Solomon Islands	3	157.358	-8.63667	11
Solomon Islands	3	157.358	-8.64	0
Solomon Islands	3	157.383	-8.65833	0
Solomon Islands	3	157.442	-8.605	43
Solomon Islands	3	157.443	-8.65333	24
Vanuatu	1	167.035	-15.7333	17
Vanuatu	1	167.035	-15.6933	1
Vanuatu	1	166.892	-15.0767	2
Vanuatu	1	166.88	-15.0517	21
Vanuatu	1	166.878	-15.0533	1
Vanuatu	1	166.905	-15.0283	22
Vanuatu	1	166.918	-14.995	17
Vanuatu	1	166.918	-14.9517	15
Vanuatu	1	166.923	-14.9183	1
Vanuatu	1	166.855	-14.8917	38
Vanuatu	1	166.857	-14.9033	1
Vanuatu	1	166.87	-15.06	2
Vanuatu	1	166.86	-15.0067	51
Vanuatu	1	166.9	-15.0483	4
Vanuatu	1	166.917	-15.035	3
Vanuatu	1	166.917	-14.995	53
Vanuatu	1	166.905	-14.975	54
Vanuatu	1	166.858	-14.8983	1
Vanuatu	1	166.897	-14.8517	20
Vanuatu	1	166.95	-14.9033	1
Vanuatu	1	166.847	-15.11	10
Vanuatu	1	167.965	-16.5917	1
Vanuatu	1	167.957	-16.625	18
Vanuatu	1	167.96	-16.6567	1
Vanuatu	1	167.978	-16.705	1
Vanuatu	1	167.98	-16.715	6
Vanuatu	1	167.987	-16.735	3
Vanuatu	1	167.985	-16.755	1
Vanuatu	1	167.925	-16.5117	4
Vanuatu	1	167.873	-16.42	3
Vanuatu	1	167.807	-16.34	2
Vanuatu	1	167.78	-16.3067	7
Vanuatu	1	167.863	-16.75	4
